# Supplementary material for: A randomized, placebo-controlled trial of a nasal spray solution containing broadly potent neutralizing antibodies against SARS-CoV-2 variants in healthy volunteers
Source: bioRxiv or medRxiv preprint supplement (doi:10.1101/2022.10.04.22280574), 2022-10-05
Supplement: Supplementary file [file media-3.pdf]

## Supplemental Data S2

Nasal sinuscopy images of participants in the COVITRAP™ and placebo groups on days 0, 7, and 14

Nasal sinuscopy images are displayed in random order of participants.

### COVITRAP™ group (n = 27)

| C1     | Nostril                                                                             |                                                                                     | C2     | Nostril                                                                              |                                                                                       |
|--------|-------------------------------------------------------------------------------------|-------------------------------------------------------------------------------------|--------|--------------------------------------------------------------------------------------|---------------------------------------------------------------------------------------|
|        | Right                                                                               | Left                                                                                |        | Right                                                                                | Left                                                                                  |
| Day 0  |    |    | Day 0  |    |    |
| Day 7  |    |    | Day 7  |    |    |
| Day 14 |   |   | Day 14 |   |   |
| C3     | Right                                                                               | Left                                                                                | C4     | Right                                                                                | Left                                                                                  |
| Day 0  |  |  | Day 0  |  |  |
| Day 7  |  |  | Day 7  |  |  |
| Day 14 |  |  | Day 14 |  |  |
| C5     | Right                                                                               | Left                                                                                | C6     | Right                                                                                | Left                                                                                  |
| Day 0  |  |  | Day 0  |  |  |
| Day 7  |  |  | Day 7  |  |  |
| Day 14 |  |  | Day 14 |  |  |

|        | Nostril                                                                             |                                                                                     |        | Nostril                                                                              |                                                                                       |
|--------|-------------------------------------------------------------------------------------|-------------------------------------------------------------------------------------|--------|--------------------------------------------------------------------------------------|---------------------------------------------------------------------------------------|
|        | Right                                                                               | Left                                                                                |        | Right                                                                                | Left                                                                                  |
| C7     |                                                                                     |                                                                                     | C8     |                                                                                      |                                                                                       |
| Day 0  |    |    | Day 0  |    |    |
| Day 7  |    |    | Day 7  |    |    |
| Day 14 |    |    | Day 14 |    |    |
| C9     |                                                                                     |                                                                                     | C10    |                                                                                      |                                                                                       |
| Day 0  |    |    | Day 0  |    |    |
| Day 7  |   |   | Day 7  |   |   |
| Day 14 |  |  | Day 14 |  |  |
| C11    |                                                                                     |                                                                                     | C12    |                                                                                      |                                                                                       |
| Day 0  |  |  | Day 0  |  |  |
| Day 7  |  |  | Day 7  |  |  |
| Day 14 |  |  | Day 14 |  |  |

|        | Nostril                                                                             |                                                                                     |        | Nostril                                                                              |                                                                                       |
|--------|-------------------------------------------------------------------------------------|-------------------------------------------------------------------------------------|--------|--------------------------------------------------------------------------------------|---------------------------------------------------------------------------------------|
|        | Right                                                                               | Left                                                                                |        | Right                                                                                | Left                                                                                  |
| C13    |                                                                                     |                                                                                     | C14    |                                                                                      |                                                                                       |
| Day 0  |    |    | Day 0  |    |    |
| Day 7  |    |    | Day 7  |    |    |
| Day 14 |    |    | Day 14 |    |    |
| C15    |                                                                                     |                                                                                     | C16    |                                                                                      |                                                                                       |
| Day 0  |    |    | Day 0  |    |    |
| Day 7  |   |   | Day 7  |   |   |
| Day 14 |  |  | Day 14 |  |  |
| C17    |                                                                                     |                                                                                     | C18    |                                                                                      |                                                                                       |
| Day 0  |  |  | Day 0  |  |  |
| Day 7  |  |  | Day 7  |  |  |
| Day 14 |  |  | Day 14 |  |  |

|        | Nostril                                                                             |                                                                                     |        | Nostril                                                                              |                                                                                       |
|--------|-------------------------------------------------------------------------------------|-------------------------------------------------------------------------------------|--------|--------------------------------------------------------------------------------------|---------------------------------------------------------------------------------------|
|        | Right                                                                               | Left                                                                                |        | Right                                                                                | Left                                                                                  |
| C19    |                                                                                     |                                                                                     | C20    |                                                                                      |                                                                                       |
| Day 0  |    |    | Day 0  |    |    |
| Day 7  |    |    | Day 7  |    |    |
| Day 14 |    |    | Day 14 |    |    |
| C21    |                                                                                     |                                                                                     | C22    |                                                                                      |                                                                                       |
| Day 0  |    |    | Day 0  |    |    |
| Day 7  |   |   | Day 7  |   |   |
| Day 14 |  |  | Day 14 |  |  |
| C23    |                                                                                     |                                                                                     | C24    |                                                                                      |                                                                                       |
| Day 0  |  |  | Day 0  |  |  |
| Day 7  |  |  | Day 7  |  |  |
| Day 14 |  |  | Day 14 |  |  |

|        | Nostril                                                                             |                                                                                     |        | Nostril                                                                            |                                                                                     |
|--------|-------------------------------------------------------------------------------------|-------------------------------------------------------------------------------------|--------|------------------------------------------------------------------------------------|-------------------------------------------------------------------------------------|
|        | Right                                                                               | Left                                                                                |        | Right                                                                              | Left                                                                                |
| C25    |                                                                                     |                                                                                     | C26    |                                                                                    |                                                                                     |
| Day 0  |    |    | Day 0  |  |  |
| Day 7  |    |    | Day 7  |  |  |
| Day 14 |    |    | Day 14 |  |  |
| C27    | Right                                                                               | Left                                                                                |        |                                                                                    |                                                                                     |
| Day 0  |    |    |        |                                                                                    |                                                                                     |
| Day 7  |   |   |        |                                                                                    |                                                                                     |
| Day 14 |  |  |        |                                                                                    |                                                                                     |

**Placebo group (n = 9)**

|        | Nostril                                                                             |                                                                                     |        | Nostril                                                                              |                                                                                       |
|--------|-------------------------------------------------------------------------------------|-------------------------------------------------------------------------------------|--------|--------------------------------------------------------------------------------------|---------------------------------------------------------------------------------------|
|        | Right                                                                               | Left                                                                                |        | Right                                                                                | Left                                                                                  |
| P1     |                                                                                     |                                                                                     | P2     |                                                                                      |                                                                                       |
| Day 0  |    |    | Day 0  |    |    |
| Day 7  |    |    | Day 7  |    |    |
| Day 14 |    |    | Day 14 |    |    |
| P3     |                                                                                     |                                                                                     | P4     |                                                                                      |                                                                                       |
| Day 0  |    |    | Day 0  |    |    |
| Day 7  |   |   | Day 7  |   |   |
| Day 14 |  |  | Day 14 |  |  |
| P5     |                                                                                     |                                                                                     | P6     |                                                                                      |                                                                                       |
| Day 0  |  |  | Day 0  |  |  |
| Day 7  |  |  | Day 7  |  |  |
| Day 14 |  |  | Day 14 |  |  |

|        | Nostril                                                                             |                                                                                     |        | Nostril                                                                            |                                                                                     |
|--------|-------------------------------------------------------------------------------------|-------------------------------------------------------------------------------------|--------|------------------------------------------------------------------------------------|-------------------------------------------------------------------------------------|
| P7     | Right                                                                               | Left                                                                                | P8     | Right                                                                              | Left                                                                                |
| Day 0  |    |    | Day 0  |  |  |
| Day 7  |    |    | Day 7  |  |  |
| Day 14 |    |    | Day 14 |  |  |
| P9     | Right                                                                               | Left                                                                                |        |                                                                                    |                                                                                     |
| Day 0  |    |    |        |                                                                                    |                                                                                     |
| Day 7  |   |   |        |                                                                                    |                                                                                     |
| Day 14 |  |  |        |                                                                                    |                                                                                     |
