# Supplementary material for: A randomized, placebo-controlled trial of a nasal spray solution containing broadly potent neutralizing antibodies against SARS-CoV-2 variants in healthy volunteers
Source: bioRxiv or medRxiv preprint supplement (doi:10.1101/2022.10.04.22280574), 2022-10-05
Supplement: Supplementary file [file media-4.pdf]

## Supplemental Data S3

### Detailed statistical report of the intranasal SARS-CoV-2 inhibitory effects of COVITRAP™

| VOCs         | Product   | Timepoint of nasal fluid sample collection in relation to the study product application | <i>n</i> | Median of % inhibition (IQR25%-IQR75%) | 95% CI of median | Wilcoxon test (P value) |
|--------------|-----------|-----------------------------------------------------------------------------------------|----------|----------------------------------------|------------------|-------------------------|
| Ancestral    | Placebo   | Before                                                                                  | 4        | 7.69<br>(1.34 - 67.38)                 | 0 - 86.51        | 0.1875                  |
|              |           | Immediately after                                                                       | 4        | 14.35<br>(3.25 - 75.39)                | 0 - 95.27        |                         |
|              | COVITRAP™ | Before                                                                                  | 13       | 12.41<br>(3.56 - 27.39)                | 0 - 33.63        | 1.2207E-4               |
|              |           | Immediately after                                                                       | 13       | 97.58<br>(97.11 - 97.67)               | 96.93 - 97.72    |                         |
|              | Placebo   | Before                                                                                  | 5        | 24.16<br>(6.48 - 94.45)                | 0 - 97.73        | 0.1563                  |
|              |           | 6 hours after                                                                           | 5        | 46.68<br>(33.58 - 86.97)               | 20.72 - 97.86    |                         |
|              | COVITRAP™ | Before                                                                                  | 14       | 24.03<br>(12.2 - 34.9)                 | 4.06 - 38.36     | 6.1035E-05              |
|              |           | 6 hours after                                                                           | 14       | 91.72<br>(76.2 - 97.04)                | 66.43 - 97.29    |                         |
| Delta        | Placebo   | Before                                                                                  | 4        | 2.98<br>(2.25 - 49.94)                 | 2.13 - 65.46     | 0.3125                  |
|              |           | Immediately after                                                                       | 4        | 5.38<br>(0.53 - 65.7)                  | 0 - 84.73        |                         |
|              | COVITRAP™ | Before                                                                                  | 13       | 8.02<br>(1.35 - 30.07)                 | 0.83 - 35.06     | 1.2207E-4               |
|              |           | Immediately after                                                                       | 13       | 97.44<br>(96.88 - 97.57)               | 96.61 - 97.62    |                         |
|              | Placebo   | Before                                                                                  | 5        | 35.01<br>(6.96 - 86.66)                | 0 - 96.83        | 0.0938                  |
|              |           | 6 hours after                                                                           | 5        | 48.4<br>(23.64 - 86.17)                | 23.08 - 97.63    |                         |
|              | COVITRAP™ | Before                                                                                  | 14       | 21.53<br>(3.979 - 23.23)               | 0 - 24.04        | 6.1035E-05              |
|              |           | 6 hours after                                                                           | 14       | 88.67<br>(73.01 - 96.31)               | 70.83 - 96.92    |                         |
| Omicron BA.2 | Placebo   | Before                                                                                  | 4        | 2.16<br>(0 - 33.58)                    | 0 - 43.33        | 0.1250                  |
|              |           | Immediately after                                                                       | 4        | 12.5<br>(2.39 - 50.35)                 | 0 - 61.98        |                         |
|              | COVITRAP™ | Before                                                                                  | 13       | 3.64<br>(0 - 10.99)                    | 0 - 11.58        | 1.2207E-4               |
|              |           | Immediately after                                                                       | 13       | 94.65<br>(92.43 - 95.54)               | 91.69 - 95.74    |                         |
|              | Placebo   | Before                                                                                  | 5        | 13.63<br>(3.14 - 50.38)                | 0 - 70.69        | 0.0625                  |
|              |           | 6 hours after                                                                           | 5        | 17.77<br>(13.32 - 59.87)               | 10.35 - 81.63    |                         |
|              | COVITRAP™ | Before                                                                                  | 14       | 8.59<br>(0.09 - 15.79)                 | 0.04 - 16.78     | 6.1035E-05              |
|              |           | 6 hours after                                                                           | 14       | 70.6<br>(54.83 - 85.09)                | 48.33 - 88.95    |                         |
